# Supplementary material for: Controlling the symmetry of hexamonodentate 3d-transition metal complexes through symmetry propagation from high-symmetry Ti–Mo and Zr–Mo clusters via hydrogen-bonding interactions
Source: Royal Society of Chemistry journal article supplement (doi:10.1039/d4dt02120g), 2024-01-01
Supplement: d4dt02120g1.pdf [file d4dt02120g1.pdf]

## Supporting Information

# Controlling the symmetry of hexamono-dentate 3d-transition metal complexes through symmetry propagation from high-symmetry Ti–Mo and Zr–Mo clusters via hydrogen-bonding interactions

Ryoji Mitsuhashi,<sup>1,\*</sup> Yuya Imai,<sup>2</sup> Sugiarto,<sup>2</sup> Hiroshi Sakiyama,<sup>3</sup> Yuji Kikukawa,<sup>2</sup> Yoshihito Hayashi<sup>2\*</sup>

<sup>1</sup> Institute of Liberal Arts and Science, Kanazawa University; Kakuma, Kanazawa, Ishikawa 920-1192, Japan

<sup>2</sup> Department of Chemistry, Kanazawa University; Kakuma, Kanazawa, Ishikawa 920-1192, Japan

<sup>3</sup> Department of Science, Faculty of Science, Yamagata University, 1-4-12 Kojirakawa, Yamagata, 990-8560, Japan

E-mail mitsuhashi@staff.kanazawa-u.ac.jp

Contents:

### 1. <sup>1</sup>H NMR spectrum

**Figure S1.** <sup>1</sup>H NMR spectra of **ZnZr** in dms<sub>o</sub>-d<sub>6</sub>. Two sets of resonance peaks for N–H atoms were observed at 7.07 and 5.23 ppm in 1:2 integration ratio.

### 2. X-Ray crystallography

**Table S1.** Crystallographic information of **FeTi** and **FeZr**.

**Table S2.** Crystallographic information of **CoTi** and **CoZr**.

**Table S3.** Crystallographic information of **NiTi** and **NiZr**.

**Table S4.** Crystallographic information of **ZnTi** and **ZnZr**.

**Figure S2.** Crystal structures of the cationic part of **MTi** along the *a*-axis. (a) **FeTi**, (b) **CoTi**, (c) **NiTi** and (d) **ZnTi**. The perchlorate anions were removed for clarity. White and light blue balls are Ti and Mo, respectively.

**Figure S3.** Crystal structures of **MZr** along the *a*-axis. (a) **FeZr**, (b) **CoZr**, (c) **NiZr** and (d) **ZnZr**. The perchlorate anions were removed for clarity. Yellow and light blue balls are Zr and Mo, respectively.

**Table S5.** Selected distances and angles in **TiMo6**<sup>4+</sup>.

**Table S6.** Selected bonding parameters in **ZrMo6**<sup>4+</sup>.

**Table S7.** Selected bonding parameters around [M(H<sub>2</sub>O)<sub>6</sub>]<sup>2+</sup> cations (M = Fe, Co, Ni, and Zn; Å, °).

**Figure S4.** X-band powder EPR spectrum of **CoZr** at 4 K. The fitted parameter: *g*<sub>x</sub>, *g*<sub>y</sub> = 1.940, *g*<sub>z</sub> = 8.450, *A*<sub>x</sub>, *A*<sub>y</sub> = 637 MHz, *A*<sub>z</sub> = 850 MHz.

### 3. EPR Measurements

**Figure S4.** X-band powder EPR spectrum of **CoZr** at 4 K. The fitted parameter: *g*<sub>x</sub>, *g*<sub>y</sub> = 1.940, *g*<sub>z</sub> = 8.450, *A*<sub>x</sub>, *A*<sub>y</sub> = 637 MHz, *A*<sub>z</sub> = 850 MHz.

### 4. Magnetic Measurements

**Figure S5.** Magnetization curves for (a) **FeTi**, (b) **CoTi** and, (c) **NiTi** at 2, 4, 6, and 8 K. The black solid lines represent fits of the Hamiltonians.

**Figure S6.** Magnetization curves for (a) **FeZr**, (b) **CoZr** and, (c) **NiZr** at 2, 4, 6, and 8 K. The black solid lines represent fits of the Hamiltonians.

**Figure S7.** Dc field dependence of (a) the  $\chi_M'$  vs. frequency plots and (b)  $\chi_M''$  vs. frequency plots for **CoTi** at 1.9 K with ac frequency of 1–1488 Hz. The lines are guide for the eye.

**Figure S8.** (a) Cole–Cole plot for **CoTi** at 1.9 K under variable field. The solid lines represent the fit to a generalized Debye model. (b) The field dependence of the relaxation time derived from the fit.

**Table S8.** Cole–Cole fit values for **CoTi** at 1.9 K with an applied dc field of 0.2–4 kOe.

**Figure S9.** Temperature dependence of (a) the in-phase  $\chi_M'$  vs. frequency plots and (b) out-of-phase  $\chi_M''$  vs. frequency plots for **CoTi** in the presence of 1 kOe with ac frequency of 1–1488 Hz. The lines are guide for the eye.

**Figure S10.** Cole–Cole plot for **CoTi** in the presence of 1 kOe dc field at variable temperature. The solid lines represent the fit to a generalized Debye model.

**Table S9.** Cole-Cole fit values for **CoTi** at 1.9–4.5 K with an applied dc field of 1 kOe.

**Figure S11.** Dc field dependence of (a) the in-phase  $\chi_M'$  vs. frequency plots and (b) out-of-phase  $\chi_M''$  vs. frequency plots for **CoZr** at 1.9 K with ac frequency of 1–1488 Hz. The lines are guide for the eye.

**Figure S12.** (a) Cole–Cole plot for **CoZr** at 1.9 K under variable field. The solid lines represent the fit to a generalized Debye model. (b) The field dependence of the relaxation time derived from the fit.

**Table S10.** Cole-Cole fit values for **CoZr** at 1.9 K with an applied dc field of 0.2–5 kOe.

**Figure S13.** Temperature dependence of (a) the in-phase  $\chi_M'$  vs. frequency plots and (b) out-of-phase  $\chi_M''$  vs. frequency plots for **CoZr** in the presence of 0.8 kOe with ac frequency of 1–1488 Hz. The lines are guide for the eye.

**Figure S14.** Cole–Cole plot for **CoZr** in the presence of 1 kOe dc field at variable temperature. The solid lines represent the fit to a generalized Debye model.

**Table S11.** Cole-Cole fit values for **CoZr** at 1.9–4.5 K with an applied dc field of 0.8 kOe.

**Figure S15.** The energy levels of *d*-orbital-related molecular orbitals for  $[\text{Ni}(\text{H}_2\text{O})_6]^{2+}$  complex cation in **NiTi** on the basis of the DFT computation (LC-BOP/6-31G).

**Figure S16.** The energy level diagrams for six-coordinate  $d^6$  ion. (a) Bailar twisting distortion from. (b) Trigonal elongation/compression. Racah and AOM parameters:  $B = 1050 \text{ cm}^{-1}$ ,  $C = 4500 \text{ cm}^{-1}$ ,  $e_\sigma = 4000 \text{ cm}^{-1}$ .

## 1. $^1\text{H}$ NMR spectrum

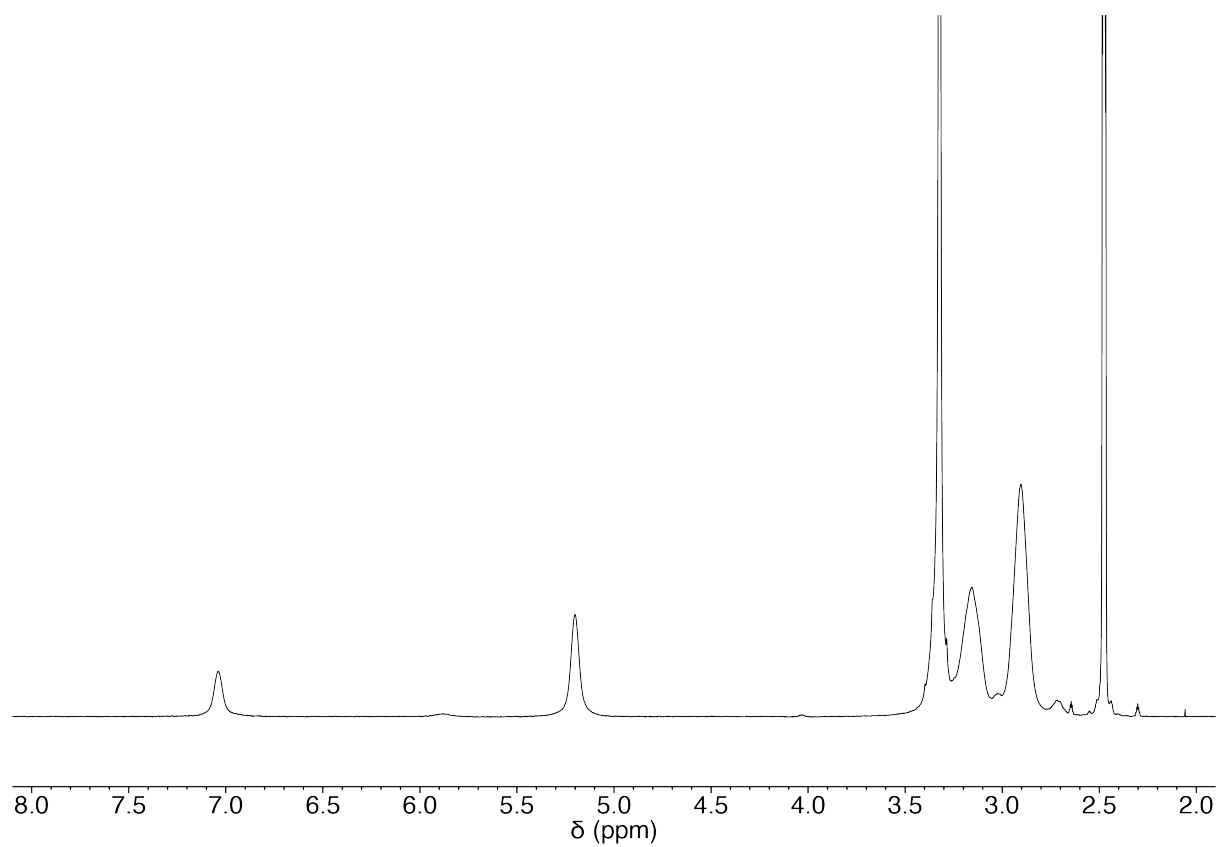

**Figure S1.**  $^1\text{H}$  NMR spectra of  $\text{ZnZr}$  in  $\text{dms0-d}_6$ . Two sets of resonance peaks for N-H atoms were observed at 7.07 and 5.23 ppm in 1:2 integration ratio.

## 2. X-Ray crystallography

**Table S1.** Crystallographic information of **FeTi** and **FeZr**.

|                                                       | <b>FeTi</b>                                                                                           | <b>FeZr</b>                                                                                           |
|-------------------------------------------------------|-------------------------------------------------------------------------------------------------------|-------------------------------------------------------------------------------------------------------|
| Formula                                               | C <sub>36</sub> H <sub>102</sub> Cl <sub>6</sub> FeMo <sub>6</sub> N <sub>18</sub> O <sub>48</sub> Ti | C <sub>36</sub> H <sub>102</sub> Cl <sub>6</sub> FeMo <sub>6</sub> N <sub>18</sub> O <sub>48</sub> Zr |
| Formula weight                                        | 2447.44                                                                                               | 2490.76                                                                                               |
| Crystal system                                        | Trigonal                                                                                              | Trigonal                                                                                              |
| Size / mm                                             | 0.14×0.12×0.09                                                                                        | 0.10×0.06×0.04                                                                                        |
| Space group                                           | R3                                                                                                    | R3                                                                                                    |
| <i>a</i> / Å                                          | 21.6648(4)                                                                                            | 21.8319(4)                                                                                            |
| <i>c</i> / Å                                          | 14.6787(4)                                                                                            | 14.7616(3)                                                                                            |
| <i>V</i> / Å <sup>3</sup>                             | 5966.6(3)                                                                                             | 6093.2(3)                                                                                             |
| <i>Z</i>                                              | 3                                                                                                     | 3                                                                                                     |
| <i>T</i> / K                                          | 104(2)                                                                                                | 102(2)                                                                                                |
| Density / g cm <sup>-3</sup>                          | 2.043                                                                                                 | 2.036                                                                                                 |
| $\mu$ / mm <sup>-1</sup>                              | 1.499                                                                                                 | 1.498                                                                                                 |
| <i>F</i> (000)                                        | 3690                                                                                                  | 3744                                                                                                  |
| 2 $\theta$ <sub>max</sub> / °                         | 55                                                                                                    | 55                                                                                                    |
| No. of reflections measured                           | 10783                                                                                                 | 10009                                                                                                 |
| No. of independent reflections                        | 4493 ( <i>R</i> <sub>int</sub> = 0.0210)                                                              | 5470 ( <i>R</i> <sub>int</sub> = 0.0279)                                                              |
| Data/restraints/parameters                            | 4493/148/399                                                                                          | 5470/152/399                                                                                          |
| <i>R</i> <sub>1</sub> [ <i>I</i> > 2.00σ( <i>I</i> )] | 0.0317                                                                                                | 0.0308                                                                                                |
| <i>wR</i> <sub>2</sub> (all reflections)              | 0.0877                                                                                                | 0.0790                                                                                                |
| Goodness of fit                                       | 0.822                                                                                                 | 1.075                                                                                                 |
| Highest peak, deepest hole / e Å <sup>-3</sup>        | 1.602, -1.700                                                                                         | 0.745, -1.606                                                                                         |
| Flack                                                 | 0.44(5)                                                                                               | 0.019(18)                                                                                             |
| CCDC Deposition #                                     | 2372554                                                                                               | 2372558                                                                                               |

**Table S2.** Crystallographic information of **CoTi** and **CoZr**.

|                                                       | <b>CoTi</b>                                                                                           | <b>CoZr</b>                                                                                           |
|-------------------------------------------------------|-------------------------------------------------------------------------------------------------------|-------------------------------------------------------------------------------------------------------|
| Formula                                               | C <sub>36</sub> H <sub>102</sub> Cl <sub>6</sub> CoMo <sub>6</sub> N <sub>18</sub> O <sub>48</sub> Ti | C <sub>36</sub> H <sub>102</sub> Cl <sub>6</sub> CoMo <sub>6</sub> N <sub>18</sub> O <sub>48</sub> Zr |
| Formula weight                                        | 2450.52                                                                                               | 2493.84                                                                                               |
| Crystal system                                        | Trigonal                                                                                              | Trigonal                                                                                              |
| Size / mm                                             | 0.14×0.09×0.05                                                                                        | 0.08×0.06×0.04                                                                                        |
| Space group                                           | R3                                                                                                    | R3                                                                                                    |
| <i>a</i> / Å                                          | 21.5929(7)                                                                                            | 21.7971(4)                                                                                            |
| <i>c</i> / Å                                          | 14.6575(5)                                                                                            | 14.7552(3)                                                                                            |
| <i>V</i> / Å <sup>3</sup>                             | 5918.5(4)                                                                                             | 6071.2(3)                                                                                             |
| <i>Z</i>                                              | 3                                                                                                     | 3                                                                                                     |
| <i>T</i> / K                                          | 104(2)                                                                                                | 102(2)                                                                                                |
| Density / g cm <sup>-3</sup>                          | 2.063                                                                                                 | 2.046                                                                                                 |
| $\mu$ / mm <sup>-1</sup>                              | 1.537                                                                                                 | 1.529                                                                                                 |
| <i>F</i> (000)                                        | 3693                                                                                                  | 3747                                                                                                  |
| 2 $\theta$ <sub>max</sub> / °                         | 55                                                                                                    | 57                                                                                                    |
| No. of reflections measured                           | 9959                                                                                                  | 17067                                                                                                 |
| No. of independent reflections                        | 4799 ( <i>R</i> <sub>int</sub> = 0.0339)                                                              | 6463 ( <i>R</i> <sub>int</sub> = 0.0296)                                                              |
| Data/restraints/parameters                            | 4799/164/399                                                                                          | 6463/252/411                                                                                          |
| <i>R</i> <sub>1</sub> [ <i>I</i> > 2.00σ( <i>I</i> )] | 0.0410                                                                                                | 0.0354                                                                                                |
| <i>wR</i> <sub>2</sub> (all reflections)              | 0.01091                                                                                               | 0.0902                                                                                                |
| Goodness of fit                                       | 1.040                                                                                                 | 1.074                                                                                                 |
| Highest peak, deepest hole / e Å <sup>-3</sup>        | 1.022, -1.449                                                                                         | 0.628, -1.739                                                                                         |
| Flack                                                 | 0.44(5)                                                                                               | 0.004(15)                                                                                             |
| CCDC Deposition #                                     | 2372555                                                                                               | 2372559                                                                                               |

**Table S3.** Crystallographic information of **NiTi** and **NiZr**.

|                                                       | <b>NiTi</b>                                                                                           | <b>NiZr</b>                                                                                           |
|-------------------------------------------------------|-------------------------------------------------------------------------------------------------------|-------------------------------------------------------------------------------------------------------|
| Formula                                               | C <sub>36</sub> H <sub>102</sub> Cl <sub>6</sub> Mo <sub>6</sub> N <sub>18</sub> NiO <sub>48</sub> Ti | C <sub>36</sub> H <sub>102</sub> Cl <sub>6</sub> Mo <sub>6</sub> N <sub>18</sub> NiO <sub>48</sub> Zr |
| Formula weight                                        | 2450.30                                                                                               | 2493.62                                                                                               |
| Crystal system                                        | Trigonal                                                                                              | Trigonal                                                                                              |
| Size / mm                                             | 0.16×0.12×0.06                                                                                        | 0.08×0.07×0.04                                                                                        |
| Space group                                           | <i>R</i> 3                                                                                            | <i>R</i> 3                                                                                            |
| <i>a</i> / Å                                          | 21.6510(8)                                                                                            | 21.7869(4)                                                                                            |
| <i>c</i> / Å                                          | 14.6425(4)                                                                                            | 14.6803(3)                                                                                            |
| <i>V</i> / Å <sup>3</sup>                             | 5944.3(5)                                                                                             | 6034.7(3)                                                                                             |
| <i>Z</i>                                              | 3                                                                                                     | 3                                                                                                     |
| <i>T</i> / K                                          | 100(2)                                                                                                | 102(2)                                                                                                |
| Density / g cm <sup>-3</sup>                          | 2.053                                                                                                 | 2.058                                                                                                 |
| $\mu$ / mm <sup>-1</sup>                              | 1.559                                                                                                 | 1.566                                                                                                 |
| <i>F</i> (000)                                        | 3696                                                                                                  | 3750                                                                                                  |
| $2\theta_{\max}$ / °                                  | 55                                                                                                    | 55                                                                                                    |
| No. of reflections measured                           | 10374                                                                                                 | 8842                                                                                                  |
| No. of independent reflections                        | 4240 ( <i>R</i> <sub>int</sub> = 0.0346)                                                              | 5351 ( <i>R</i> <sub>int</sub> = 0.0194)                                                              |
| Data/restraints/parameters                            | 4240/148/399                                                                                          | 6351/202/401                                                                                          |
| <i>R</i> <sub>1</sub> [ <i>I</i> > 2.00σ( <i>I</i> )] | 0.0428                                                                                                | 0.0337                                                                                                |
| <i>wR</i> <sub>2</sub> (all reflections)              | 0.01174                                                                                               | 0.0902                                                                                                |
| Goodness of fit                                       | 0.984                                                                                                 | 1.074                                                                                                 |
| Highest peak, deepest hole / e Å <sup>-3</sup>        | 2.483, -1.447                                                                                         | 0.759, -2.051                                                                                         |
| Flack                                                 | 0.06(4)                                                                                               | 0.00(4)                                                                                               |
| CCDC Deposition #                                     | 2372556                                                                                               | 2372560                                                                                               |

**Table S4.** Crystallographic information of **ZnTi** and **ZnZr**.

|                                                       | <b>ZnTi</b>                                                                                           | <b>ZnZr</b>                                                                                           |
|-------------------------------------------------------|-------------------------------------------------------------------------------------------------------|-------------------------------------------------------------------------------------------------------|
| Formula                                               | C <sub>36</sub> H <sub>102</sub> Cl <sub>6</sub> Mo <sub>6</sub> N <sub>18</sub> O <sub>48</sub> TiZn | C <sub>36</sub> H <sub>102</sub> Cl <sub>6</sub> Mo <sub>6</sub> N <sub>18</sub> O <sub>48</sub> ZnZr |
| Formula weight                                        | 2456.96                                                                                               | 2500.28                                                                                               |
| Crystal system                                        | Trigonal                                                                                              | Trigonal                                                                                              |
| Size / mm                                             | 0.22×0.16×0.12                                                                                        | 0.16×0.11×0.06                                                                                        |
| Space group                                           | <i>R</i> 3                                                                                            | <i>R</i> 3                                                                                            |
| <i>a</i> / Å                                          | 21.6448(3)                                                                                            | 21.7780(3)                                                                                            |
| <i>c</i> / Å                                          | 14.6822(3)                                                                                            | 14.7532(2)                                                                                            |
| <i>V</i> / Å <sup>3</sup>                             | 5957.0(3)                                                                                             | 6059.72(19)                                                                                           |
| <i>Z</i>                                              | 3                                                                                                     | 3                                                                                                     |
| <i>T</i> / K                                          | 104(2)                                                                                                | 102(2)                                                                                                |
| Density / g cm <sup>-3</sup>                          | 2.055                                                                                                 | 2.055                                                                                                 |
| $\mu$ / mm <sup>-1</sup>                              | 1.621                                                                                                 | 1.623                                                                                                 |
| <i>F</i> (000)                                        | 3702                                                                                                  | 3756                                                                                                  |
| $2\theta_{\max}$ / °                                  | 55                                                                                                    | 55                                                                                                    |
| No. of reflections measured                           | 10464                                                                                                 | 10949                                                                                                 |
| No. of independent reflections                        | 4770 ( <i>R</i> <sub>int</sub> = 0.0123)                                                              | 5055 ( <i>R</i> <sub>int</sub> = 0.0183)                                                              |
| Data/restraints/parameters                            | 4799/170/399                                                                                          | 5055/169/400                                                                                          |
| <i>R</i> <sub>1</sub> [ <i>I</i> > 2.00σ( <i>I</i> )] | 0.0292                                                                                                | 0.0238                                                                                                |
| <i>wR</i> <sub>2</sub> (all reflections)              | 0.00826                                                                                               | 0.0640                                                                                                |
| Goodness of fit                                       | 1.040                                                                                                 | 1.083                                                                                                 |
| Highest peak, deepest hole / e Å <sup>-3</sup>        | 0.826, -2.077                                                                                         | 0.533, -1.556                                                                                         |
| Flack                                                 | 0.39(3)                                                                                               | 0.15(2)                                                                                               |
| CCDC Deposition #                                     | 2372557                                                                                               | 2372561                                                                                               |

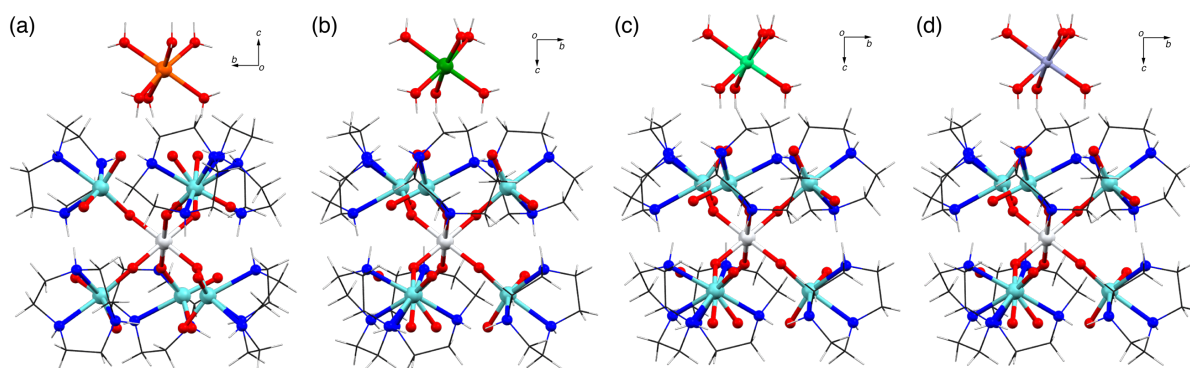

**Figure S2.** Crystal structures of the cationic part of **MTi** along the *a*-axis. (a) **FeTi**, (b) **CoTi**, (c) **NiTi** and (d) **ZnTi**. The perchlorate anions were removed for clarity. White and light blue balls are Ti and Mo, respectively.

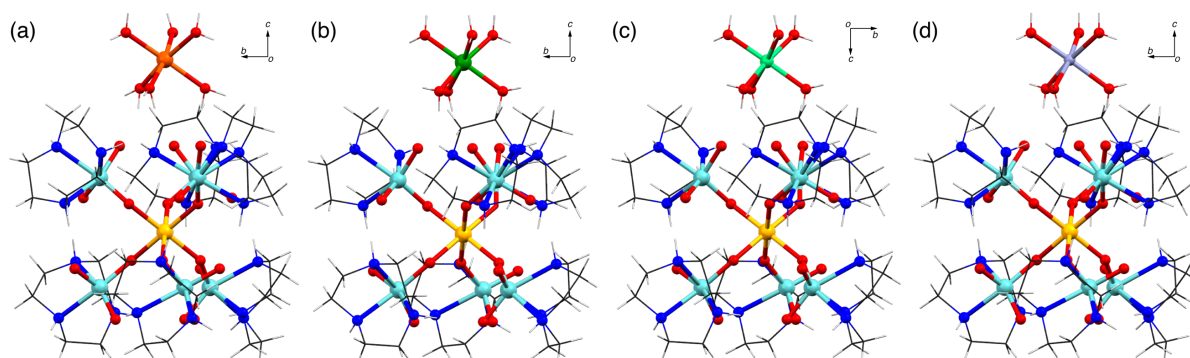

**Figure S3.** Crystal structures of **MZr** along the *a*-axis. (a) **FeZr**, (b) **CoZr**, (c) **NiZr** and (d) **ZnZr**. The perchlorate anions were removed for clarity. Yellow and light blue balls are Zr and Mo, respectively.

**Table S5.** Selected distances and angles in **MTi**.

|                                                                                         | <b>FeTi</b> | <b>CoTi</b> | <b>NiTi</b> | <b>ZnTi</b> |
|-----------------------------------------------------------------------------------------|-------------|-------------|-------------|-------------|
| Ti-O1 / Å                                                                               | 1.936(5)    | 1.937(6)    | 1.941(6)    | 1.937(4)    |
| Ti-O4 / Å                                                                               | 1.936(4)    | 1.938(6)    | 1.935(6)    | 1.937(4)    |
| O1-O1 <sup>i</sup> -O1 <sup>ii</sup> ... O4-O4 <sup>i</sup> -O4 <sup>ii</sup> / Å       | 2.232(7)    | 2.224(8)    | 2.228(8)    | 2.233(6)    |
| Mo1...Mo2 / Å                                                                           | 4.601(1)    | 4.600(1)    | 4.612(1)    | 4.608(1)    |
| Mo1...Mo1 <sup>i</sup> / Å                                                              | 4.620(1)    | 4.619(1)    | 4.630(1)    | 4.625(1)    |
| Mo2...Mo2 <sup>i</sup> / Å                                                              | 4.726(1)    | 4.717(1)    | 4.714(1)    | 4.723(3)    |
| Mo1-Mo1 <sup>i</sup> -Mo1 <sup>ii</sup> ... Mo2-Mo2 <sup>i</sup> -Mo2 <sup>ii</sup> / Å | 4.554(1)    | 4.552(1)    | 4.562(1)    | 4.560(1)    |
| Short Ti...M / Å                                                                        | 7.270(3)    | 7.243(4)    | 7.222(4)    | 7.257(3)    |
| Long Ti...M / Å                                                                         | 7.408(3)    | 7.415(4)    | 7.421(4)    | 7.425(3)    |

Symmetry code: (*i* = '-x+y, 1-x, z', *ii* = '1-y, x-y+1, z').

**Table S6.** Selected bonding parameters in **MZr**.

|                                                                                         | <b>FeZr</b> | <b>CoZr</b> | <b>NiZr</b> | <b>ZnZr</b> |
|-----------------------------------------------------------------------------------------|-------------|-------------|-------------|-------------|
| Zr-O1 / Å                                                                               | 2.072(4)    | 2.066(5)    | 2.066(5)    | 2.070(4)    |
| Zr-O4 / Å                                                                               | 2.075(4)    | 2.078(5)    | 2.077(5)    | 2.068(4)    |
| O1-O1 <sup>i</sup> -O1 <sup>ii</sup> ... O4-O4 <sup>i</sup> -O4 <sup>ii</sup> / Å       | 2.395(7)    | 2.401(6)    | 2.394(7)    | 2.594(5)    |
| Mo1...Mo2 / Å                                                                           | 4.700(1)    | 4.702(1)    | 4.703(1)    | 4.702(1)    |
| Mo1...Mo1 <sup>i</sup> / Å                                                              | 4.795(1)    | 4.798(1)    | 4.795(1)    | 4.793(1)    |
| Mo2...Mo2 <sup>i</sup> / Å                                                              | 4.908(1)    | 4.904(1)    | 4.892(1)    | 4.890(3)    |
| Mo1-Mo1 <sup>i</sup> -Mo1 <sup>ii</sup> ... Mo2-Mo2 <sup>i</sup> -Mo2 <sup>ii</sup> / Å | 4.657(1)    | 4.658(1)    | 4.658(1)    | 4.656(1)    |
| Short Zr...M / Å                                                                        | 7.307(3)    | 7.283(3)    | 7.226(3)    | 7.278(2)    |
| Long Zr...M / Å                                                                         | 7.455(3)    | 7.472(3)    | 7.454(3)    | 7.475(2)    |

Symmetry code: (*i* = '-x+y, 1-x, z', *ii* = '1-y, x-y+1, z').

**Table S7.** Selected bonding parameters around  $[M(H_2O)_6]^{2+}$  cations (M = Fe, Co, Ni, and Zn; Å, °).

|                      | <b>FeTi</b> | <b>FeZr</b> | <b>CoTi</b> | <b>CoZr</b> | <b>NiTi</b> | <b>NiZr</b> | <b>ZnTi</b> | <b>ZnZr</b> |
|----------------------|-------------|-------------|-------------|-------------|-------------|-------------|-------------|-------------|
| M–O7                 | 2.103(6)    | 2.114(6)    | 2.086(7)    | 2.082(6)    | 2.046(8)    | 2.037(7)    | 2.082(6)    | 2.084(4)    |
| M–O8                 | 2.089(6)    | 2.090(6)    | 2.062(8)    | 2.060(6)    | 2.017(8)    | 2.030(7)    | 2.044(6)    | 2.058(4)    |
| O7···O7 <sup>i</sup> | 2.974(10)   | 2.989(11)   | 2.913(14)   | 2.922(11)   | 2.875(14)   | 2.881(12)   | 2.915(11)   | 2.922(8)    |
| O8···O8 <sup>i</sup> | 3.037(12)   | 3.029(11)   | 2.967(16)   | 2.955(12)   | 2.918(15)   | 2.927(13)   | 2.952(12)   | 2.964(9)    |
| <i>s</i>             | 3.01        | 3.01        | 2.94        | 2.94        | 2.90        | 2.90        | 2.93        | 2.94        |
| (average)            |             |             |             |             |             |             |             |             |
| <i>h</i>             | 2.351(10)   | 2.365(9)    | 2.383(11)   | 2.376(9)    | 2.305(10)   | 2.301(10)   | 2.353(9)    | 2.367(7)    |
| <i>s/h</i>           | 1.28        | 1.27        | 1.23        | 1.24        | 1.26        | 1.26        | 1.25        | 1.24        |
| <i>φ</i>             | 48.8(3)     | 48.8(4)     | 49.5(5)     | 49.7(4)     | 52.9(4)     | 52.8(5)     | 49.8(4)     | 49.7(3)     |

Symmetry code: (*i* = '-x+y, 1-x, +z').

### 3. EPR Measurements

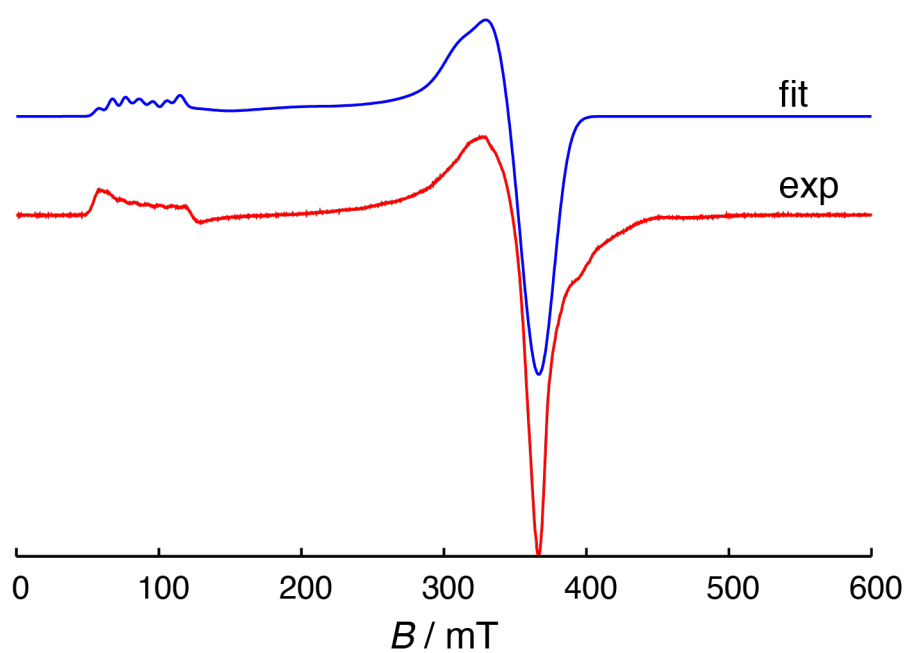

**Figure S4.** X-band powder EPR spectrum of **CoZr** at 4 K. The fitted parameter:  $g_x, g_y = 1.940, g_z = 8.450, A_x, A_y = 637$  MHz,  $A_z = 850$  MHz.



#### 4. Magnetic Measurements

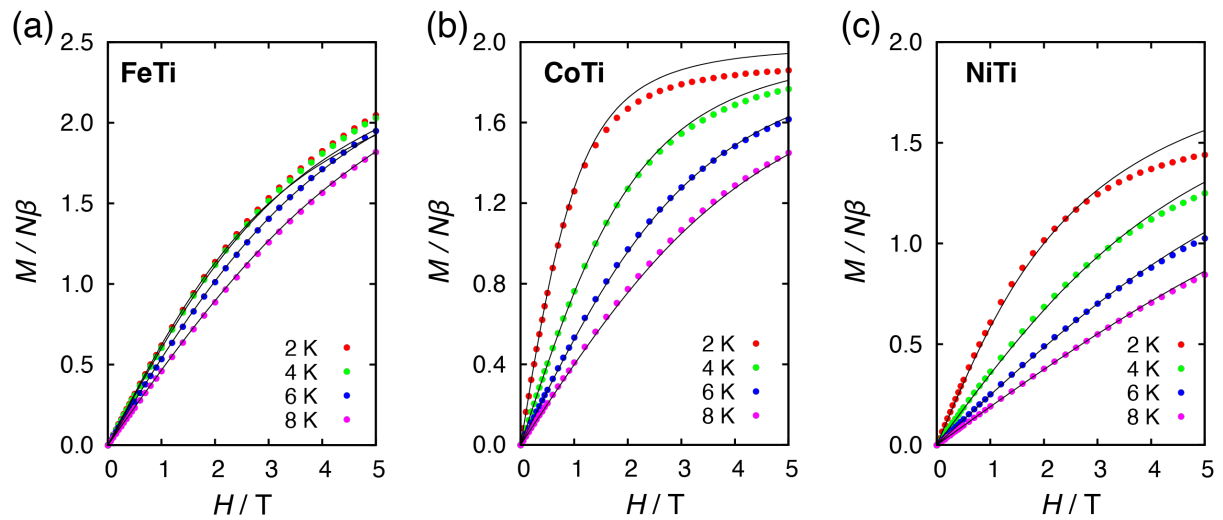

**Figure S5.** Magnetization curves for (a) FeTi, (b) CoTi and, (c) NiTi at 2, 4, 6, and 8 K. The black solid lines represent fits of the Hamiltonians.

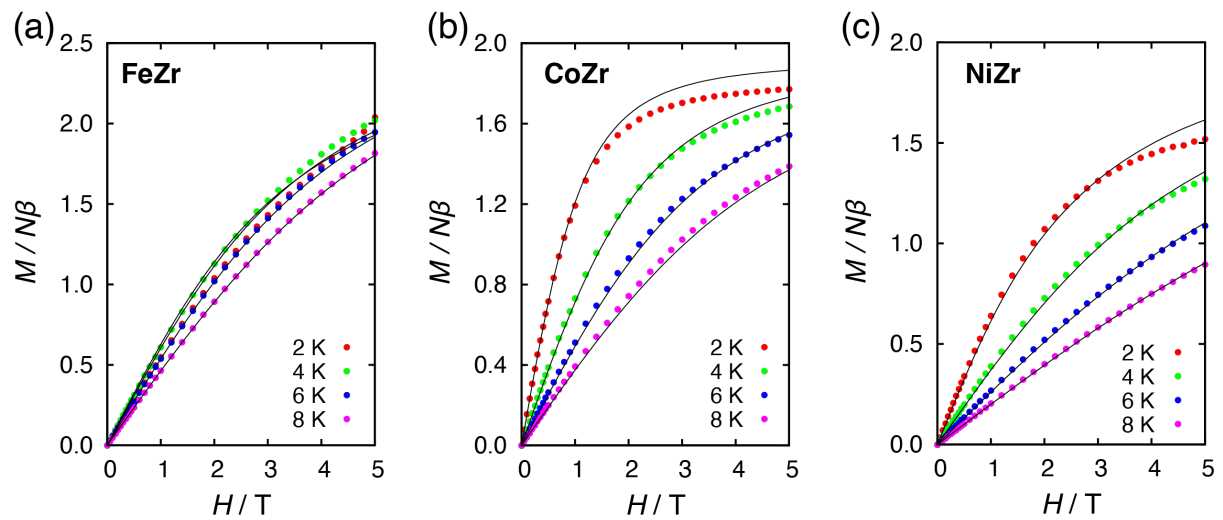

**Figure S6.** Magnetization curves for (a) FeZr, (b) CoZr and, (c) NiZr at 2, 4, 6, and 8 K. The black solid lines represent fits of the Hamiltonians.

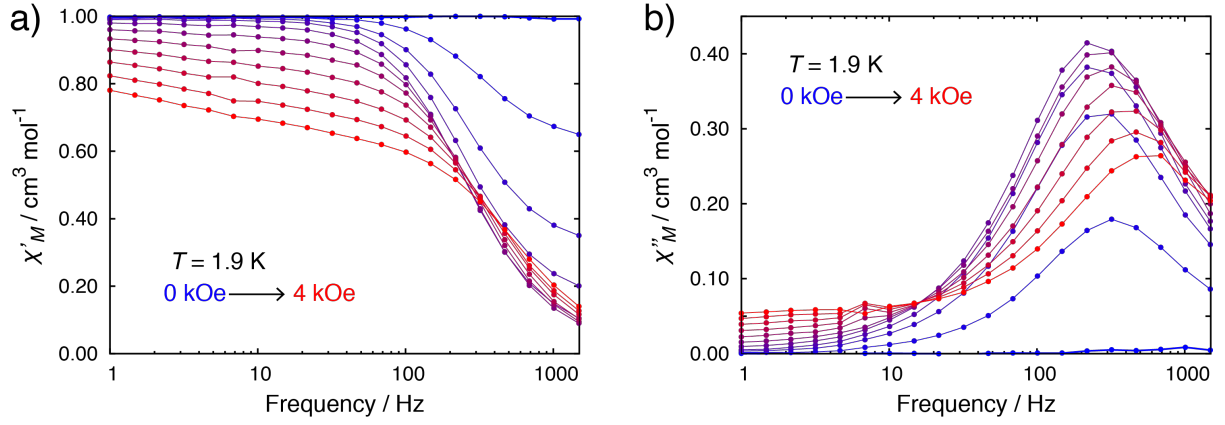

**Figure S7.** Dc field dependence of (a) the  $\chi_M'$  vs. frequency plots and (b)  $\chi_M''$  vs. frequency plots for **CoTi** at 1.9 K with ac frequency of 1–1488 Hz. The lines are guide for the eye.

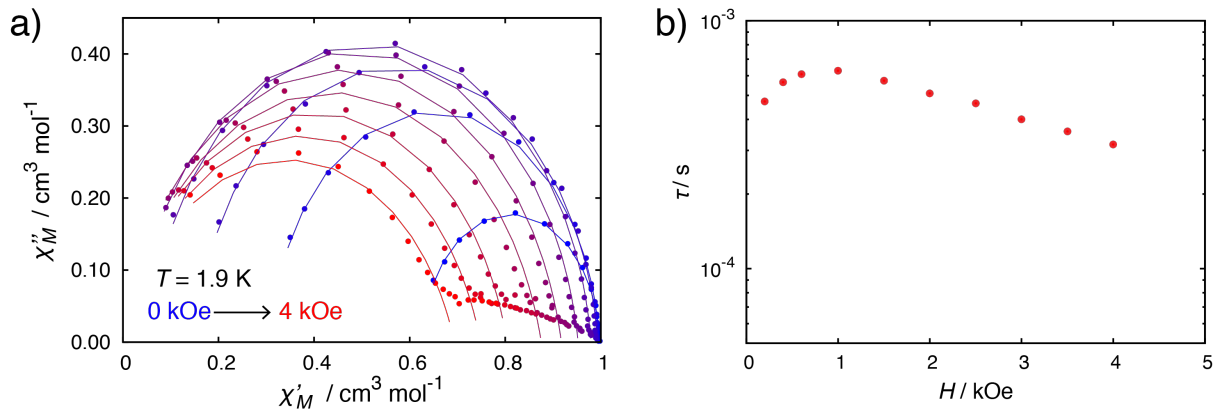

**Figure S8.** (a) Cole–Cole plot for **CoTi** at 1.9 K under variable field. The solid lines represent the fit to a generalized Debye model. (b) The field dependence of the relaxation time derived from the fit.

**Table S8.** Cole-Cole fit values for **CoTi** at 1.9 K with an applied dc field of 0.2–4 kOe.

| $H / \text{kOe}$ | $\chi_S / \text{cm}^3 \text{mol}^{-1}$ | $\chi_T / \text{cm}^3 \text{mol}^{-1}$ | $\tau / \text{s}$      | $\alpha$               |
|------------------|----------------------------------------|----------------------------------------|------------------------|------------------------|
| 0.2              | $6.274 \times 10^{-1}$                 | $9.968 \times 10^{-1}$                 | $4.722 \times 10^{-4}$ | $2.459 \times 10^{-2}$ |
| 0.4              | $3.088 \times 10^{-1}$                 | $9.965 \times 10^{-1}$                 | $5.655 \times 10^{-4}$ | $4.559 \times 10^{-2}$ |
| 0.6              | $1.528 \times 10^{-1}$                 | $9.934 \times 10^{-1}$                 | $6.094 \times 10^{-4}$ | $6.043 \times 10^{-2}$ |
| 1.0              | $5.484 \times 10^{-2}$                 | $9.794 \times 10^{-1}$                 | $6.280 \times 10^{-4}$ | $7.068 \times 10^{-2}$ |
| 1.5              | $1.949 \times 10^{-2}$                 | $9.526 \times 10^{-1}$                 | $5.725 \times 10^{-4}$ | $9.316 \times 10^{-2}$ |
| 2.0              | $1.034 \times 10^{-14}$                | $9.174 \times 10^{-1}$                 | $5.093 \times 10^{-4}$ | $1.233 \times 10^{-1}$ |
| 2.5              | $1.374 \times 10^{-14}$                | $8.755 \times 10^{-1}$                 | $4.649 \times 10^{-4}$ | $1.477 \times 10^{-1}$ |
| 3.0              | $2.118 \times 10^{-15}$                | $8.038 \times 10^{-1}$                 | $4.004 \times 10^{-4}$ | $1.485 \times 10^{-1}$ |
| 3.5              | $2.667 \times 10^{-15}$                | $7.478 \times 10^{-1}$                 | $3.574 \times 10^{-4}$ | $1.685 \times 10^{-1}$ |
| 4.0              | $3.824 \times 10^{-15}$                | $6.937 \times 10^{-1}$                 | $3.167 \times 10^{-4}$ | $1.982 \times 10^{-1}$ |

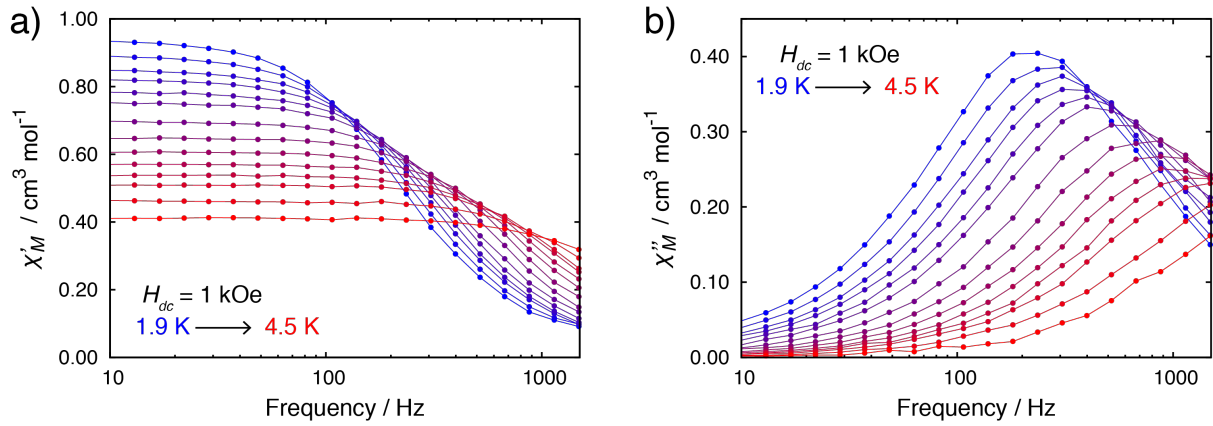

**Figure S9.** Temperature dependence of (a) the in-phase  $\chi_M'$  vs. frequency plots and (b) out-of-phase  $\chi_M''$  vs. frequency plots for CoTi in the presence of 1 kOe with ac frequency of 1–1488 Hz. The lines are guide for the eye.

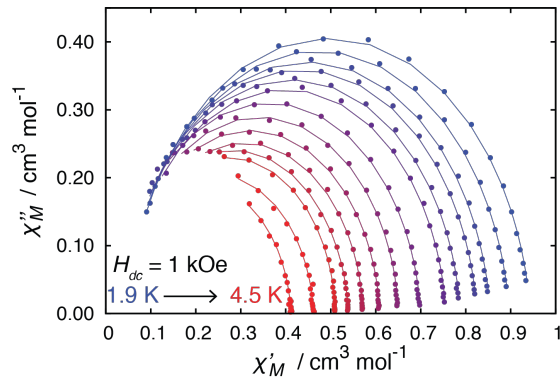

**Figure S10.** Cole–Cole plot for CoTi in the presence of 1 kOe dc field at variable temperature. The solid lines represent the fit to a generalized Debye model.

**Table S9.** Cole–Cole fit values for CoTi at 1.9–4.5 K with an applied dc field of 1 kOe.

| $T / \text{K}$ | $\chi_S / \text{cm}^3 \text{mol}^{-1}$ | $\chi_T / \text{cm}^3 \text{mol}^{-1}$ | $\tau / \text{s}$      | $\alpha$               |
|----------------|----------------------------------------|----------------------------------------|------------------------|------------------------|
| 1.9            | $4.828 \times 10^{-2}$                 | $9.438 \times 10^{-1}$                 | $6.900 \times 10^{-4}$ | $6.342 \times 10^{-2}$ |
| 2.0            | $4.459 \times 10^{-2}$                 | $8.971 \times 10^{-1}$                 | $5.873 \times 10^{-4}$ | $6.193 \times 10^{-2}$ |
| 2.1            | $4.056 \times 10^{-2}$                 | $8.550 \times 10^{-1}$                 | $5.009 \times 10^{-4}$ | $6.048 \times 10^{-2}$ |
| 2.2            | $3.983 \times 10^{-2}$                 | $8.250 \times 10^{-1}$                 | $4.496 \times 10^{-4}$ | $5.715 \times 10^{-2}$ |
| 2.3            | $3.717 \times 10^{-2}$                 | $7.881 \times 10^{-1}$                 | $3.879 \times 10^{-4}$ | $5.520 \times 10^{-2}$ |
| 2.4            | $4.246 \times 10^{-2}$                 | $7.559 \times 10^{-1}$                 | $3.432 \times 10^{-4}$ | $4.959 \times 10^{-2}$ |
| 2.6            | $2.766 \times 10^{-2}$                 | $6.997 \times 10^{-1}$                 | $2.653 \times 10^{-4}$ | $5.100 \times 10^{-2}$ |
| 2.8            | $3.454 \times 10^{-2}$                 | $6.509 \times 10^{-1}$                 | $2.183 \times 10^{-4}$ | $4.012 \times 10^{-2}$ |
| 3.0            | $3.431 \times 10^{-2}$                 | $6.089 \times 10^{-1}$                 | $1.804 \times 10^{-4}$ | $4.049 \times 10^{-2}$ |
| 3.2            | $4.249 \times 10^{-2}$                 | $5.721 \times 10^{-1}$                 | $1.546 \times 10^{-4}$ | $3.328 \times 10^{-2}$ |
| 3.4            | $2.518 \times 10^{-2}$                 | $5.395 \times 10^{-1}$                 | $1.256 \times 10^{-4}$ | $4.201 \times 10^{-2}$ |
| 3.6            | $3.337 \times 10^{-2}$                 | $5.103 \times 10^{-1}$                 | $1.124 \times 10^{-4}$ | $2.255 \times 10^{-2}$ |
| 4.0            | $2.478 \times 10^{-2}$                 | $4.618 \times 10^{-1}$                 | $8.194 \times 10^{-5}$ | $4.197 \times 10^{-2}$ |
| 4.5            | $5.065 \times 10^{-3}$                 | $4.112 \times 10^{-1}$                 | $5.605 \times 10^{-5}$ | $3.674 \times 10^{-2}$ |

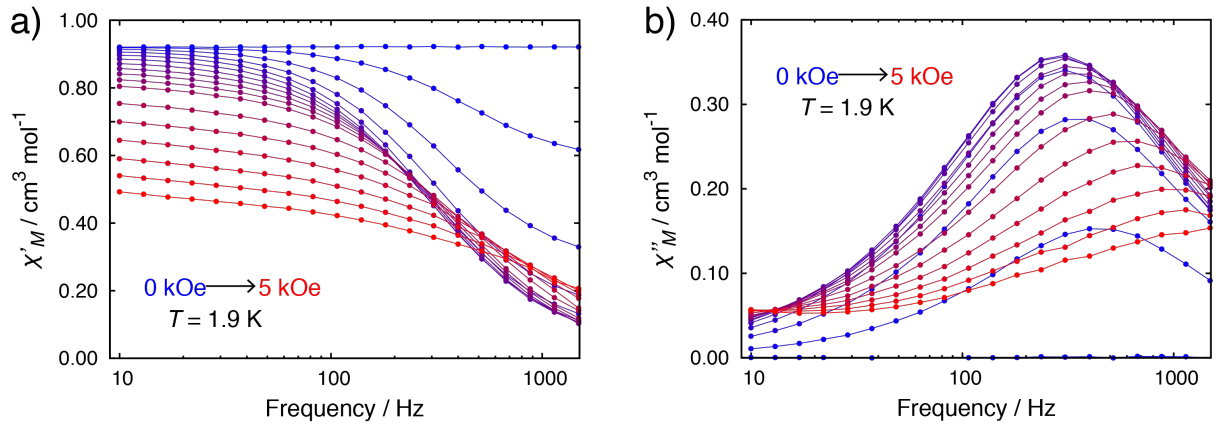

**Figure S11.** Dc field dependence of (a) the in-phase  $\chi_M'$  vs. frequency plots and (b) out-of-phase  $\chi_M''$  vs. frequency plots for **CoZr** at 1.9 K with ac frequency of 1–1488 Hz. The lines are guide for the eye.

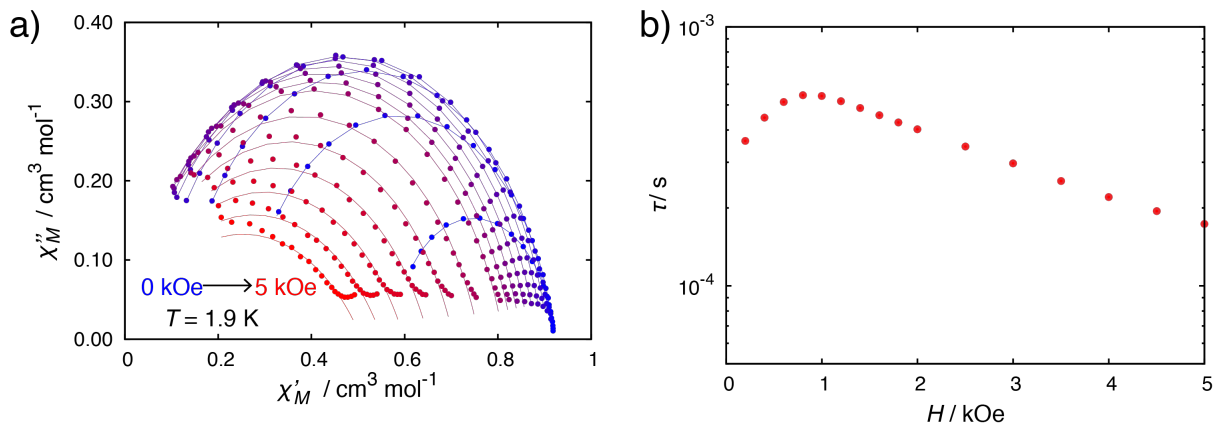

**Figure S12.** (a) Cole–Cole plot for **CoZr** at 1.9 K under variable field. The solid lines represent the fit to a generalized Debye model. (b) The field dependence of the relaxation time derived from the fit.

**Table S10.** Cole-Cole fit values for **CoZr** at 1.9 K with an applied dc field of 0.2–5 kOe.

| $H / \text{kOe}$ | $\chi_S / \text{cm}_3 \text{ mol}^{-1}$ | $\chi_T / \text{cm}_3 \text{ mol}^{-1}$ | $\tau / \text{s}$      | $\alpha$               |
|------------------|-----------------------------------------|-----------------------------------------|------------------------|------------------------|
| 0.2              | $5.756 \times 10^{-1}$                  | $9.205 \times 10^{-1}$                  | $3.634 \times 10^{-4}$ | $7.601 \times 10^{-2}$ |
| 0.4              | $2.568 \times 10^{-1}$                  | $9.206 \times 10^{-1}$                  | $4.461 \times 10^{-4}$ | $1.020 \times 10^{-1}$ |
| 0.6              | $1.126 \times 10^{-1}$                  | $9.155 \times 10^{-1}$                  | $5.130 \times 10^{-4}$ | $1.070 \times 10^{-1}$ |
| 0.8              | $5.894 \times 10^{-2}$                  | $9.074 \times 10^{-1}$                  | $5.448 \times 10^{-4}$ | $1.110 \times 10^{-1}$ |
| 1.0              | $3.265 \times 10^{-2}$                  | $8.968 \times 10^{-1}$                  | $5.410 \times 10^{-4}$ | $1.209 \times 10^{-1}$ |
| 1.2              | $1.735 \times 10^{-2}$                  | $8.829 \times 10^{-1}$                  | $5.171 \times 10^{-4}$ | $1.307 \times 10^{-1}$ |
| 1.4              | $6.783 \times 10^{-3}$                  | $8.675 \times 10^{-1}$                  | $4.856 \times 10^{-4}$ | $1.402 \times 10^{-1}$ |
| 1.6              | $7.289 \times 10^{-8}$                  | $8.505 \times 10^{-1}$                  | $4.556 \times 10^{-4}$ | $1.480 \times 10^{-1}$ |
| 1.8              | $1.066 \times 10^{-7}$                  | $8.320 \times 10^{-1}$                  | $4.283 \times 10^{-4}$ | $1.553 \times 10^{-1}$ |
| 2.0              | $1.465 \times 10^{-7}$                  | $8.117 \times 10^{-1}$                  | $4.025 \times 10^{-4}$ | $1.621 \times 10^{-1}$ |
| 2.5              | $2.226 \times 10^{-7}$                  | $7.598 \times 10^{-1}$                  | $3.450 \times 10^{-4}$ | $1.880 \times 10^{-1}$ |
| 3.0              | $3.137 \times 10^{-7}$                  | $7.050 \times 10^{-1}$                  | $2.975 \times 10^{-4}$ | $2.164 \times 10^{-1}$ |
| 3.5              | $3.506 \times 10^{-7}$                  | $6.516 \times 10^{-1}$                  | $2.539 \times 10^{-4}$ | $2.542 \times 10^{-1}$ |
| 4.0              | $4.876 \times 10^{-7}$                  | $5.992 \times 10^{-1}$                  | $2.203 \times 10^{-4}$ | $2.933 \times 10^{-1}$ |
| 4.5              | $4.839 \times 10^{-7}$                  | $5.523 \times 10^{-1}$                  | $1.942 \times 10^{-4}$ | $3.422 \times 10^{-1}$ |
| 5.0              | $5.542 \times 10^{-7}$                  | $5.083 \times 10^{-1}$                  | $1.736 \times 10^{-4}$ | $3.881 \times 10^{-1}$ |

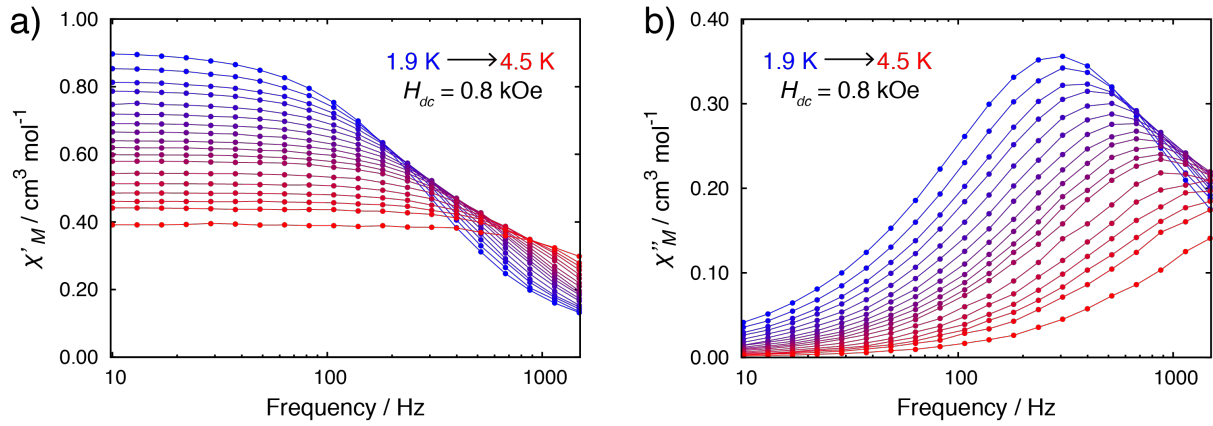

**Figure S13.** Temperature dependence of (a) the in-phase  $\chi'_M$  vs. frequency plots and (b) out-of-phase  $\chi''_M$  vs. frequency plots for **CoZr** in the presence of 0.8 kOe with ac frequency of 1–1488 Hz. The lines are guide for the eye.

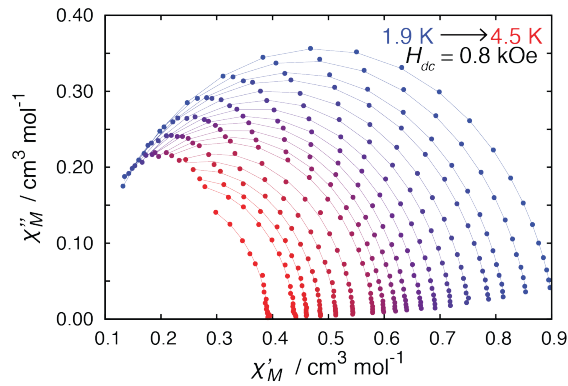

**Figure S14.** Cole–Cole plot for **CoZr** in the presence of 1 kOe dc field at variable temperature. The solid lines represent the fit to a generalized Debye model.

**Table S11.** Cole–Cole fit values for **CoZr** at 1.9–4.5 K with an applied dc field of 0.8 kOe.

| $T / \text{K}$ | $\chi'_S / \text{cm}^3 \text{mol}^{-1}$ | $\chi'_T / \text{cm}^3 \text{mol}^{-1}$ | $\tau / \text{s}$      | $\alpha$               |
|----------------|-----------------------------------------|-----------------------------------------|------------------------|------------------------|
| 1.9            | $5.894 \times 10^{-2}$                  | $9.074 \times 10^{-1}$                  | $5.448 \times 10^{-4}$ | $1.110 \times 10^{-1}$ |
| 2.0            | $5.322 \times 10^{-2}$                  | $8.627 \times 10^{-1}$                  | $4.742 \times 10^{-4}$ | $1.101 \times 10^{-1}$ |
| 2.1            | $5.087 \times 10^{-2}$                  | $8.215 \times 10^{-1}$                  | $4.162 \times 10^{-4}$ | $1.083 \times 10^{-1}$ |
| 2.2            | $4.690 \times 10^{-2}$                  | $7.931 \times 10^{-1}$                  | $3.778 \times 10^{-4}$ | $1.079 \times 10^{-1}$ |
| 2.3            | $4.744 \times 10^{-2}$                  | $7.555 \times 10^{-1}$                  | $3.355 \times 10^{-4}$ | $1.032 \times 10^{-1}$ |
| 2.4            | $4.718 \times 10^{-2}$                  | $7.246 \times 10^{-1}$                  | $3.006 \times 10^{-4}$ | $1.024 \times 10^{-1}$ |
| 2.5            | $4.027 \times 10^{-2}$                  | $6.964 \times 10^{-1}$                  | $2.670 \times 10^{-4}$ | $1.062 \times 10^{-1}$ |
| 2.6            | $4.256 \times 10^{-2}$                  | $6.698 \times 10^{-1}$                  | $2.439 \times 10^{-4}$ | $1.017 \times 10^{-1}$ |
| 2.7            | $4.031 \times 10^{-2}$                  | $6.440 \times 10^{-1}$                  | $2.211 \times 10^{-4}$ | $9.659 \times 10^{-2}$ |
| 2.8            | $4.436 \times 10^{-2}$                  | $6.229 \times 10^{-1}$                  | $2.064 \times 10^{-4}$ | $9.403 \times 10^{-2}$ |
| 2.9            | $4.078 \times 10^{-2}$                  | $6.024 \times 10^{-1}$                  | $1.874 \times 10^{-4}$ | $9.853 \times 10^{-2}$ |
| 3.0            | $4.229 \times 10^{-2}$                  | $5.830 \times 10^{-1}$                  | $1.730 \times 10^{-4}$ | $9.504 \times 10^{-2}$ |
| 3.2            | $4.652 \times 10^{-2}$                  | $5.469 \times 10^{-1}$                  | $1.505 \times 10^{-4}$ | $8.741 \times 10^{-2}$ |
| 3.4            | $3.741 \times 10^{-2}$                  | $5.155 \times 10^{-1}$                  | $1.270 \times 10^{-4}$ | $8.761 \times 10^{-2}$ |
| 3.6            | $3.808 \times 10^{-2}$                  | $4.877 \times 10^{-1}$                  | $1.106 \times 10^{-4}$ | $8.300 \times 10^{-2}$ |
| 3.8            | $4.584 \times 10^{-2}$                  | $4.626 \times 10^{-1}$                  | $9.926 \times 10^{-5}$ | $7.598 \times 10^{-2}$ |
| 4.0            | $4.561 \times 10^{-2}$                  | $4.408 \times 10^{-1}$                  | $8.670 \times 10^{-5}$ | $6.919 \times 10^{-2}$ |

4.5

$4.007 \times 10^{-2}$

$3.926 \times 10^{-1}$

$6.043 \times 10^{-5}$

$5.809 \times 10^{-2}$

---

#### 4. DFT Calculation

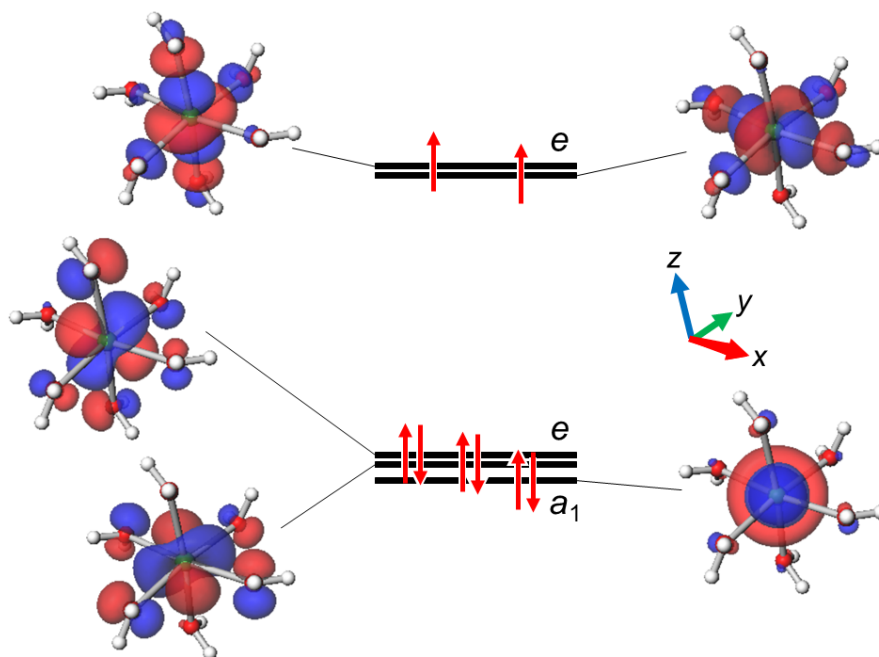

**Figure S15.** The energy levels of *d*-orbital-related molecular orbitals for  $[\text{Ni}(\text{H}_2\text{O})_6]^{2+}$  complex cation in NiTi on the basis of the DFT computation (LC-BOP/6-31G).

## 4. AOM Calculation

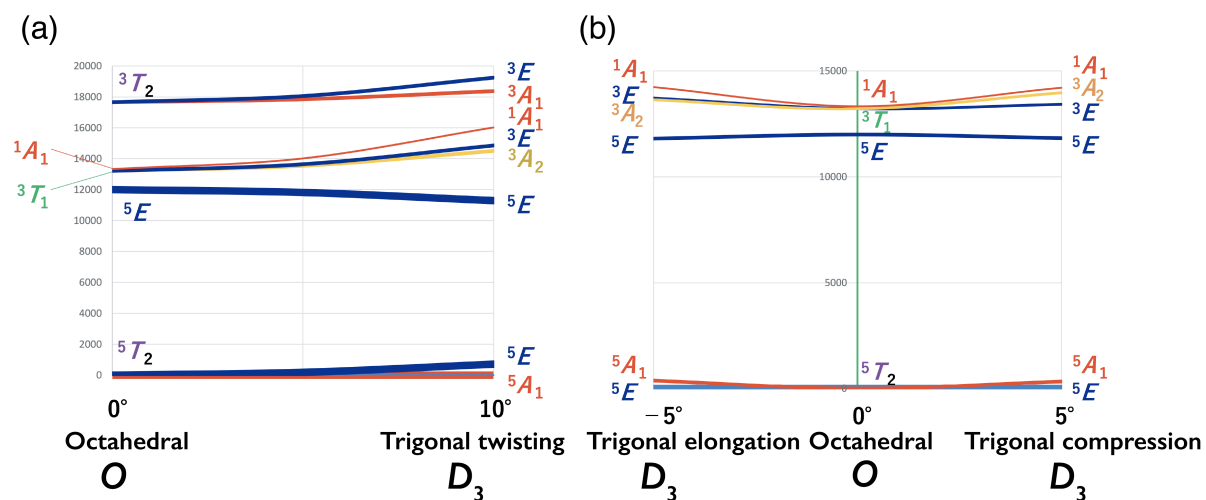

**Figure S16.** The energy level diagrams for six-coordinate  $d^6$  ion. (a) Bailar twisting distortion from. (b) Trigonal elongation/compression. Racah and AOM parameters:  $B = 1050 \text{ cm}^{-1}$ ,  $C = 4500 \text{ cm}^{-1}$ ,  $e_\sigma = 4000 \text{ cm}^{-1}$ .
